# Supplementary material for: Assessment of the intercanine gingival zenith distance as a method for determining occlusal vertical dimension
Source: Research Square preprint supplement (doi:10.21203/rs.3.rs-7153587/v1), 2025-07-25
Supplement: Supplementary file 1 [file bf03376f525d6f20f8c10d5a.xlsx]

## Sheet: DATOS
SEXO	EDAD	DDVLAC	IDVLAC
F	20	15.9	16.4
M	24	12.2	13.1
F	21	17.7	17.1
F	20	15.7	16.3
F	20	16.5	14.9
M	20	15	16.1
F	21	18.4	18.3
M	20	16.7	14.7
M	20	19.5	20
M	22	19.6	20.1
F	23	16.5	17.5
F	20	16.5	16.1
M	25	16.9	15.5
M	20	14.2	14.7
F	21	11.1	10.5
F	21	16.6	17
F	20	16.1	17.2
M	23	18	17.9
F	22	16.5	17.6
F	23	17.8	18
F	24	17.4	16.5
M	23	19.4	19.4
F	26	17.1	17.7
M	23	19.6	17.8
F	21	17.4	16.8
F	20	15.4	14.5
F	20	13.5	17
M	21	19.6	20.1
F	21	16.5	15.8
F	22	16.5	18
F	22	15.4	16.6
M	18	16	18.8
F	18	16.4	15.7
F	18	18.5	20.1
F	18	16.7	17.1
F	18	14.8	16
F	19	17.5	17.7
F	18	15.8	14.7
M	18	15.6	16.2
F	18	13.6	14.1
F	18	16.8	17.5
F	18	15.4	14
M	18	15.5	16.3
F	18	17.2	17.7
F	18	14	15
M	17	14.7	15.1
M	18	18.4	19.3
M	20	20.4	17.8
F	18	16.4	13.5
F	17	16.7	16.5
M	19	18	16.8
F	18	17.3	17.6
F	18	16.3	16.8
F	22	17.3	16.5
F	18	15.1	16.8
M	19	19.2	20.7
F	20	19.4	18.8
F	20	14.4	14.9
F	21	17.2	18.6
F	21	12.9	13.7
F	19	11.2	11.9
F	20	18.5	17.5
M	19	20	20
F	19	15.1	17.5
F	23	14.3	15.4
M	24	19.1	19.1
F	22	13.8	15.2
F	23	16.5	17.1
M	24	20.2	19.3
F	23	18.4	20.8
F	22	19	19
F	30	15.5	14.2
F	22	18.6	19.9
F	18	12.3	13.3
F	18	12.5	13.1
F	18	15.5	15.8
M	18	16.1	16.2
F	19	12.9	14.7
F	20	19.8	19.6
F	19	18.4	16.2
F	21	15.2	16.8
F	20	20.2	19
F	19	14.6	12.7
F	20	15.4	16.8
M	20	20.3	19.4
M	20	17.4	18.1
F	20	13.9	14
F	19	17.8	17.5
F	21	19	19
M	21	16.1	16
F	19	16.5	16.5
F	33	16.3	16.3
F	25	15.5	18.2
F	22	14.3	16.5
M	26	16.5	14.8
F	24	13.7	13.4
F	22	18.4	17.5
F	22	15.6	15.8
F	23	13.5	14.7
F	21	14.2	14.3
M	20	17.1	17.4
M	25	13.6	12.9
M	29	19.1	21.3
F	22	18.7	19.5
F	30	14.1	14.2
F	29	19.1	19.6
M	24	18.5	19.1
F	24	16	16.8
F	24	18	19.5
F	30	18.5	19.1
M	26	19.8	18.6
M	21	19.5	19.6
F	19	13.8	16.2
F	21	18.4	16.1
M	19	16.5	15.8
F	19	15.9	16.3
F	21	14.9	15.8
F	20	17.9	18.4
F	20	17.1	17.1
F	20	17.4	17.1
F	19	16.2	16.3
F	22	14.3	15.1
F	20	14.7	15.6
F	22	18.5	19.3
F	20	15	14.9
M	19	15.5	16.9
F	19	13.7	12.9
M	19	18.9	18.6
F	19	18.3	18.3
F	22	14.1	13.3
F	25	16	18.9
F	23	17.8	18.6
M	24	18.7	15.8
F	19	14.7	16.3
F	20	16.5	17.9
F	19	19.9	19.6
M	19	17.2	19.2
M	18	12.1	11.1
F	22	18.9	20.7
M	21	14.7	14.5
F	22	17.1	16.5
F	21	17.1	17.1
M	25	18	18.1
F	26	19.1	18.1
F	31	20.8	21
F	20	16	18.2
F	33	17.3	16
F	31	17	17.5
F	33	13	12.8
F	34	20	18
F	32	12	13
F	27	16.5	15
M	25	23.6	23.5
F	24	15	14.6
F	21	17.1	16.6
F	22	18.2	19
F	22	15.8	14.2
F	23	16	16.7
F	22	15.5	15.4
M	19	15.2	17.9
F	19	16.2	17.7
M	19	19.6	19.7
F	21	18.9	18.6
f	19	18.6	18.4
M	25	17.7	19
M	21	20.1	20.4
F	22	15.8	14.8
M	18	15.6	14.4
F	18	15.4	15.4
F	19	15.5	17.8
M	20	22.5	22.5
F	19	16	17.1
F	24	18.1	17.9
F	26	16.5	16.7
F	24	17.7	15.8
F	24	15	14.5
F	26	17.8	17.1
F	23	17.5	16.1
F	23	16.6	15.5
F	20	16.9	16.7
M	21	16.9	16.6
F	19	18.3	20.4
F	19	17.2	18.5
F	22	20.5	20.5
F	19	12.4	12.7
F	19	18.7	18.1
F	18	19.3	17.9
F	18	15.4	16.6
M	18	20.3	21.5
F	19	17.4	17.2
M	19	15.2	14.2
M	20	18.1	19.1
F	18	16.7	15.9
M	19	20.3	18.1
F	19	17.5	17.6
F	18	15.3	15.6
F	18	15.6	17.3
F	20	19.6	18.7
F	20	14.1	16.1
F	19	14.3	13.1
F	20	17.3	17.1
F	20	13.1	12.9
F	20	14.6	15.7
F	26	16.3	14.5
F	26	15.8	15.8
M	22	11	13
F	25	17.8	17.3
M	23	18.6	19.3
M	27	17.8	18.6
F	24	18.3	10.1
